# Supplementary material for: Retina-Targeted Delivery of 17β-Estradiol by the Topically Applied DHED Prodrug
Source: MDPI journal article supplement (doi:10.3390/pharmaceutics12050456), 2020-05-16
Supplement: s1 [file s1]

# Supplementary Materials: Retina-Targeted Delivery of 17 $\beta$ -Estradiol by the Topically Applied DHED Prodrug

Katalin Prokai-Tatrai, Vien Nguyen, Rebecca Guerra, Daniel L. De La Cruz, Khadiza Zaman, Fatima Rahlouni and Laszlo Prokai

**Table S1.** 2  $\times$  2  $\times$  3 factorial ANOVA of ex vivo steady-state transcorneal fluxes ( $J_{ss}$ ) listed in Table 1.

| Factor/Interaction                             | Type III Sum of Squares | Degree(s) of Freedom | F    | <i>p</i> | $\eta^2$ |
|------------------------------------------------|-------------------------|----------------------|------|----------|----------|
| Compound <sup>1</sup>                          | 385,008                 | 1                    | 577  | <0.001   | 0.472    |
| Formulation <sup>2</sup>                       | 217,716                 | 1                    | 326  | <0.001   | 0.267    |
| Species <sup>3</sup>                           | 68,634                  | 2                    | 51.4 | <0.001   | 0.084    |
| Compound $\times$ Formulation                  | 56,421                  | 1                    | 84.6 | <0.001   | 0.069    |
| Compound $\times$ Species                      | 46,099                  | 2                    | 34.5 | <0.001   | 0.056    |
| Formulation $\times$ Species                   | 16,006                  | 2                    | 12.0 | <0.001   | 0.020    |
| Compound $\times$ Formulation $\times$ Species | 10,226                  | 2                    | 7.66 | 0.003    | 0.013    |
| Error                                          | 16,015                  | 24                   |      |          | 0.020    |

<sup>1</sup> E2 and DHED (2); <sup>2</sup> Without and with HP $\beta$ CD (2); <sup>3</sup> Rat, rabbit and pig (3).

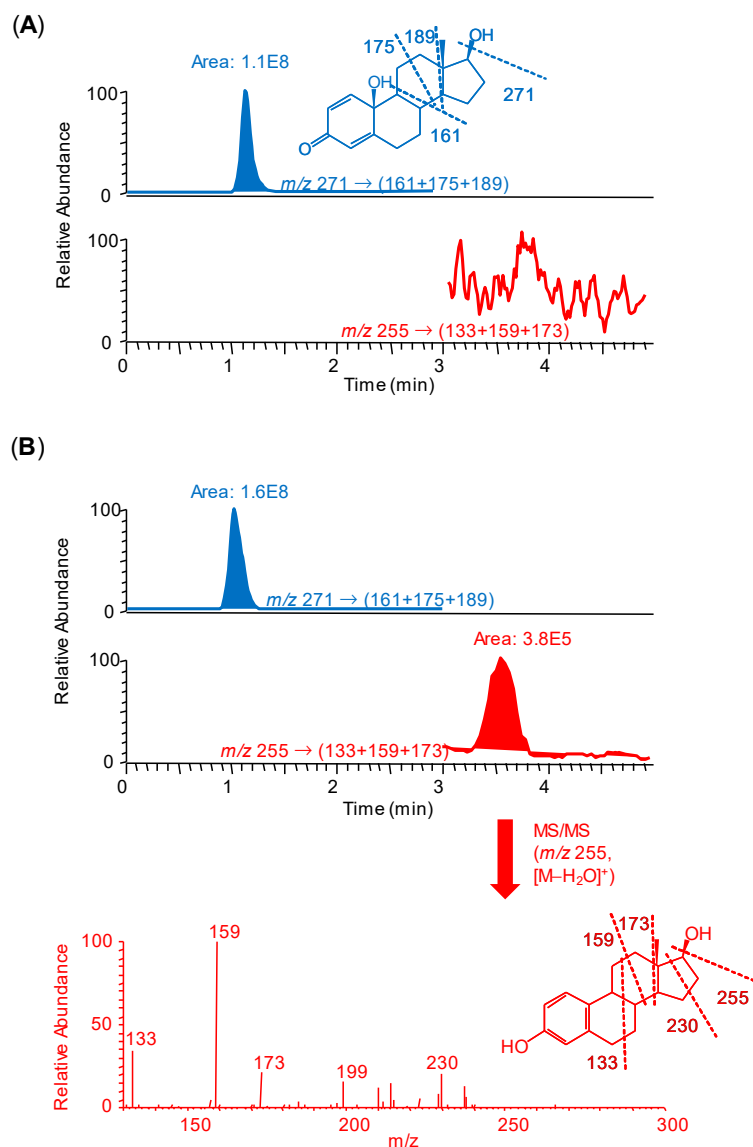

**Figure S1.** In vitro studies on DHED to E2 metabolism. **(A).** Evidence for no detectable DHED (blue) to E2 (red) conversion in the acceptor compartment of the diffusion chamber used as established by LC-APCI-MS/MS assay during a 2 h in vitro transport experiment of DHED (10  $\mu$ M) through pig cornea. Experiments in pig and rat cornea homogenates (20% *w/v*) after incubation of DHED (100 nmol/mL) at 37 °C yielded the same results as shown in chart **A**. **(B).** Conversion of DHED (blue) to E2 (red) occurred rapidly in the pig retina with  $533 \pm 158$  pmol·min<sup>-1</sup> (mg protein)<sup>-1</sup> (average  $\pm$  SEM,  $n = 3$ ) initial rate of formation.

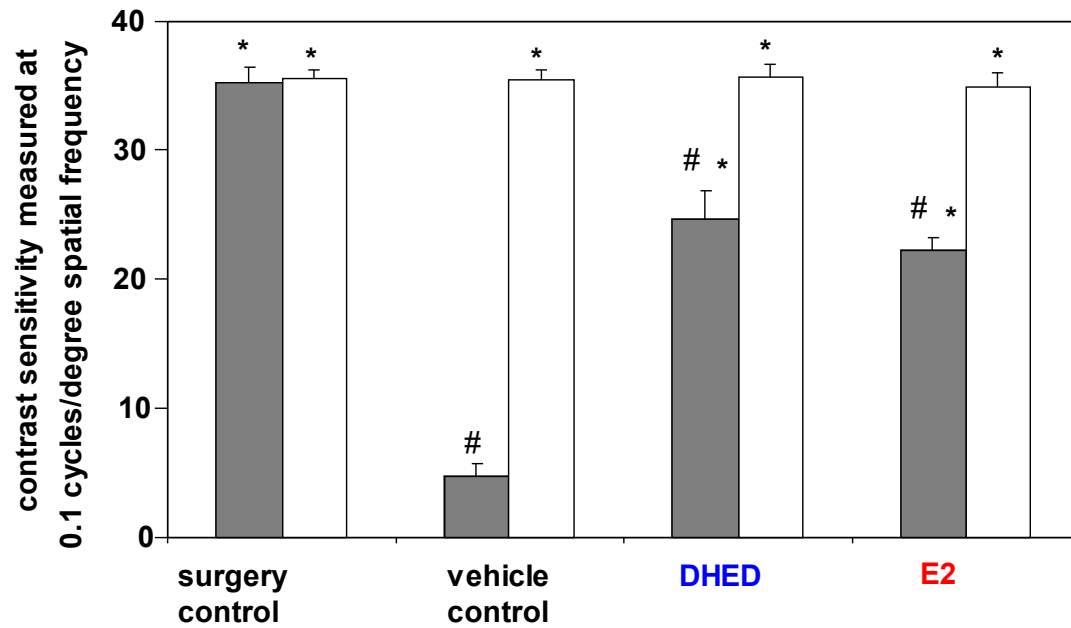

**Figure S2.** Neuroprotective effect of DHED-derived E2 on visual function measured as contrast sensitivity at a given spatial frequency in a rat model of glaucoma [17]. E2 eye drops (0.1% *w/v* in 20 % HPBC in saline vehicle) [3,19] served as positive control. DHED (0.1% *w/v* in 20 % *w/v* HPBC in saline vehicle) or 20 % *w/v* HPBC in saline vehicle was administered q.d. as eye drops for three weeks, analogously to that of E2 [3,19]. Contrast sensitivity was measured at a given spatial frequency for each treated eye individually in which IOP was increased (approximately by 25% from baseline [3]) and compared to the ipsilateral vehicle treated eye (white) (\*;  $p < 0.05$ ,  $n = 3$  per group) or to the sham surgery control (#;  $p < 0.05$ ;  $n = 3$  per group) [35].
